# Supplementary material for: Cumulative Exposure to Long Working Hours and Occurrence of Ischemic Heart Disease: Evidence From the CONSTANCES Cohort at Inception
Source: PubMed Central journal article supplement — J Am Heart Assoc. 2020 Jun 1;9(12):e015753. doi: 10.1161/JAHA.119.015753 (PMC7429044; doi:10.1161/jaha.119.015753), 2020-06-01
Supplement: JAH3-9-e015753-s001.pdf [file JAH3-9-e015753-s001.pdf]

# **SUPPLEMENTAL MATERIAL**

**Table S1. Sensitivity analysis for associations between cumulative exposure to long working hours and occurrence of ischemic heart disease with a five-year step (ORs and 95 % CIs)\*.**

| <b>Long working hours</b> | <b>Ischemic heart disease (including angina pectoris)</b> | <b>Ischemic heart disease (excluding angina pectoris)</b> |
|---------------------------|-----------------------------------------------------------|-----------------------------------------------------------|
| No                        | 1.00                                                      | 1.00                                                      |
| Yes (<5 years)            | 0.90 (0.66-1.23)                                          | 0.79 (0.53-1.20)                                          |
| Yes (≥5 and <10 years)    | 1.09 (0.83-1.44)                                          | 1.06 (0.76-1.50)                                          |
| Yes (≥10 and <15 years)   | 1.18 (0.90-1.56)                                          | 1.38 (1.00-1.90)                                          |
| Yes (≥15 and <20 years)   | 1.42 (1.08-1.87)                                          | 1.37 (0.97-1.93)                                          |
| Yes (≥20 years)           | 1.22 (1.03-1.44)                                          | 1.28 (1.04-1.58)                                          |

\*Adjusted for age, sex, occupations, body mass index, smoking habits, high-blood pressure, diabetes, dyslipidemia, and familial history of cardiovascular diseases

**Table S2. Sensitivity analysis for associations between cumulative exposure to long working hours and occurrence of ischemic heart disease using Cox regression models (Hazard ratios and 95 % CIs)\*.**

|                                       | <b>Ischemic heart disease (including angina pectoris)</b> | <b>Ischemic heart disease (excluding angina pectoris)</b> |
|---------------------------------------|-----------------------------------------------------------|-----------------------------------------------------------|
| <b>Long working hours all</b>         |                                                           |                                                           |
| No                                    | 1.00                                                      | 1.00                                                      |
| Yes (<10 years)                       | 1.00 (0.83-1.21)                                          | 0.94 (0.73-1.21)                                          |
| Yes (≥10 years)                       | 1.21 (1.07-1.37)                                          | 1.28 (1.10-1.50)                                          |
| <b>Long working hours among men</b>   |                                                           |                                                           |
| No                                    | 1.00                                                      | 1.00                                                      |
| Yes (<10 years)                       | 1.04 (0.85-1.27)                                          | 0.99 (0.76-1.29)                                          |
| Yes (≥10 years)                       | 1.25 (1.10-1.41)                                          | 1.32 (1.13-1.55)                                          |
| <b>Long working hours among women</b> |                                                           |                                                           |
| No                                    | 1.00                                                      | 1.00                                                      |
| Yes (<10 years)                       | 0.80 (0.45-1.40)                                          | 0.62 (0.27-1.40)                                          |
| Yes (≥10 years)                       | 0.91 (0.55-1.51)                                          | 0.82 (0.40-1.68)                                          |

\*Adjusted for age, sex (if not stratified on sex), occupations, body mass index, smoking habits, high-blood pressure, diabetes, dyslipidemia, and familial history of cardiovascular diseases
